# Supplementary material for: When Viruses Don’t Go Viral: The Importance of Host Phylogeographic Structure in the Spatial Spread of Arenaviruses
Source: PubMed Central journal article supplement (PMC5226678; doi:10.1371/journal.ppat.1006073), 2017-01-11

(A) L

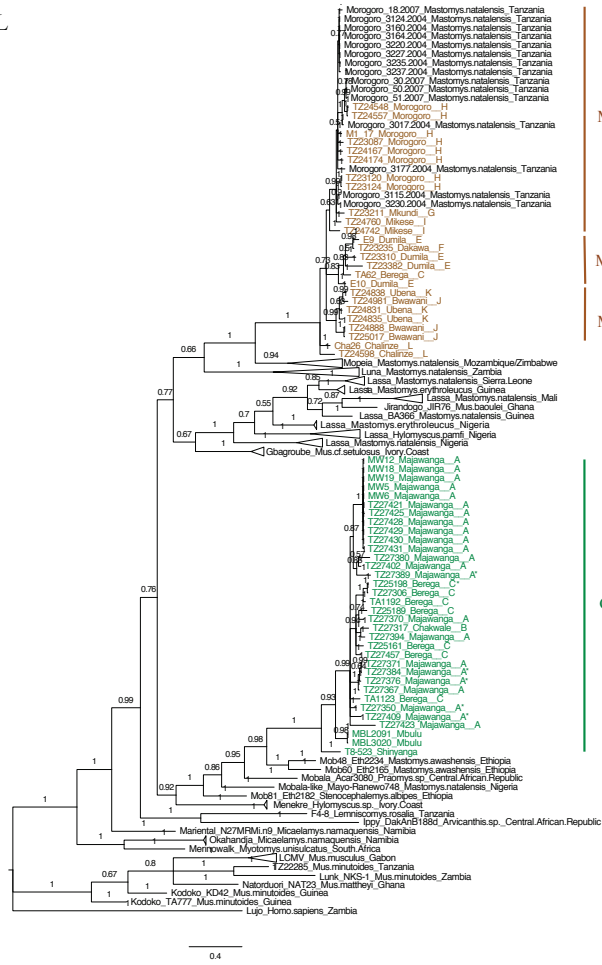

(B) GPC

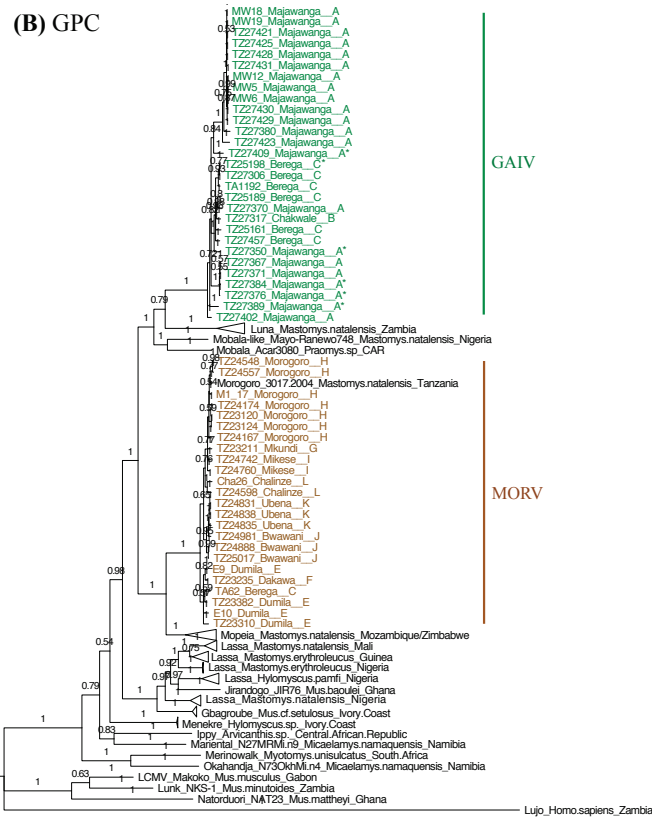

(C) NP

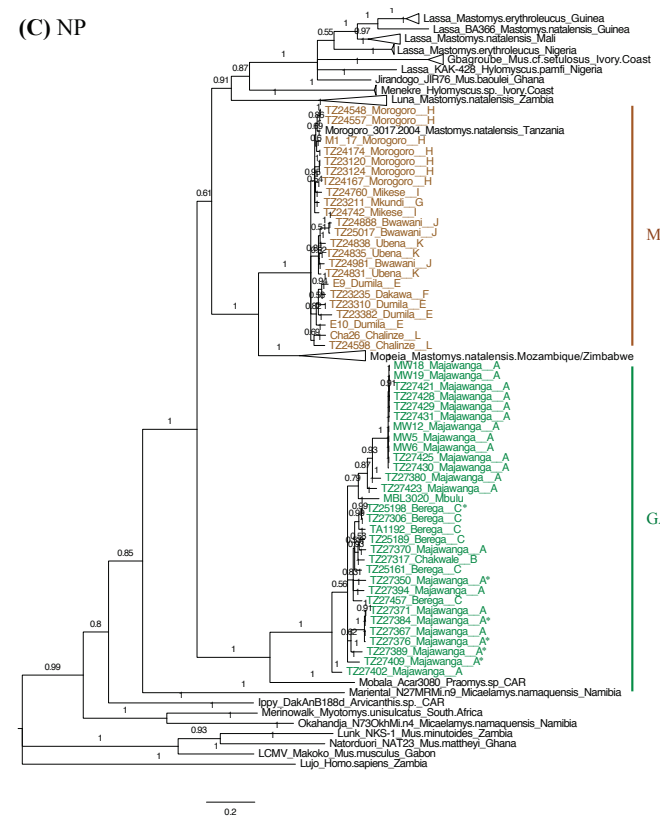

Supplement: ppat.1006073.s004.pdf [file ppat.1006073.s004.pdf]
