# Supplementary material for: When Viruses Don’t Go Viral: The Importance of Host Phylogeographic Structure in the Spatial Spread of Arenaviruses
Source: PubMed Central journal article supplement (PMC5226678; doi:10.1371/journal.ppat.1006073), 2017-01-11

Shinyanga

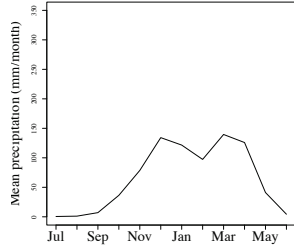

Mbulu

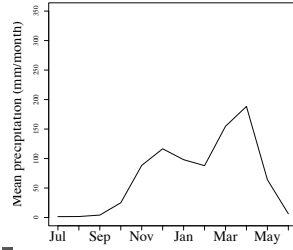

Berega

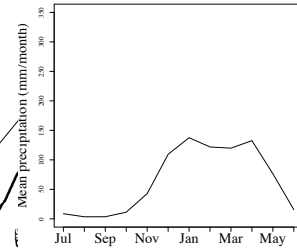

Manyoni

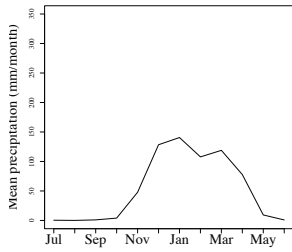

Dodoma

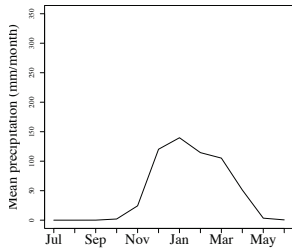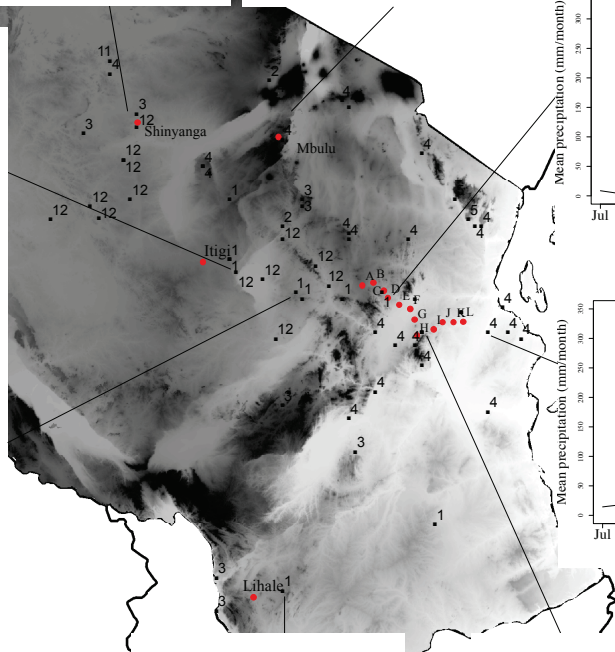

Ruvu

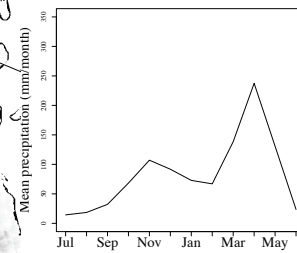

Songea

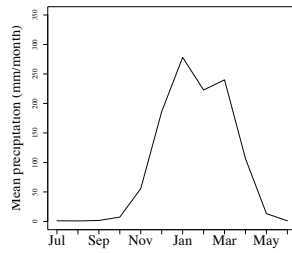

Morogoro

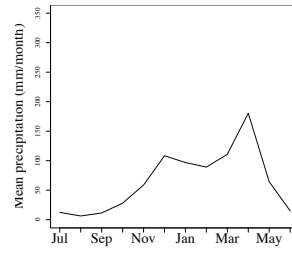

Supplement: ppat.1006073.s005.pdf [file ppat.1006073.s005.pdf]
